# Supplementary material for: Food antigens drive spontaneous IgE elevation in the absence of commensal microbiota
Source: PubMed Central journal article supplement — Sci Adv. 2019 May 22;5(5):eaaw1507. doi: 10.1126/sciadv.aaw1507 (PMC6531000; doi:10.1126/sciadv.aaw1507), 2019-05-22
Supplement: aaw1507_SM.pdf [file aaw1507_SM.pdf]

## Supplementary Materials for

### Food antigens drive spontaneous IgE elevation in the absence of commensal microbiota

Sung-Wook Hong\*, Eunju O, Jun Young Lee, Minji Lee, Daehee Han, Hyun-Ja Ko, Jonathan Sprent, Charles D. Surh, Kwang Soon Kim\*

\*Corresponding author. Email: kskim27@postech.ac.kr (K.S.K.); rozhzor@gmail.com (S.-W.H.)

Published 22 May 2019, *Sci. Adv.* **5**, eaaw1507 (2019)  
DOI: 10.1126/sciadv.aaw1507

#### This PDF file includes:

- Fig. S1. MLN and PP of GF mice are major sites for T<sub>H</sub>2-skewed immune response against food Ags.
- Fig. S2. T<sub>FH</sub> cells in MLN and PP of GF mice are generated upon weaning onto NCD, and AF mice displayed impaired generation of GC B cells and IgE-producing cells.
- Fig. S3. Levels of wheat gluten-specific IgE in GF *Rag1*<sup>-/-</sup> mice cotransferred with naïve B cells and indicated CD4<sup>+</sup> T cell subsets.
- Fig. S4. ICOS up-regulation on activated CD4<sup>+</sup> T cells is independent on the presence of T<sub>FH</sub> cells and B cells.
- Fig. S5. Expression levels of CD80, CD86, and ICOSL on MLN and PP DCs are comparable between GF and AF mice.
- Fig. S6. B cells are required for the generation of food Ag-driven T<sub>FH</sub> cells in GALT.
- Fig. S7. B cells promote terminal differentiation of food Ag-driven T<sub>FH</sub> cells by providing ICOS signaling and presenting cognate Ags.
- Fig. S8. Levels of CD4<sup>+</sup> T cell activation in MLN and PP are comparable between young and adult AF mice switched to NCD, but the latter shows increased levels of T<sub>H</sub>2 cells.
- Fig. S9. High serum IgE levels in adult GF mice are sustained by radioresistant long-lived IgE-producing cells in MLN and BM.
- Fig. S10. ICOS expression on activated CD4<sup>+</sup> T cells and CD40 expression on DCs in MLN and PP in SPF mice are both comparable with those in GF mice.

## Supplementary Materials

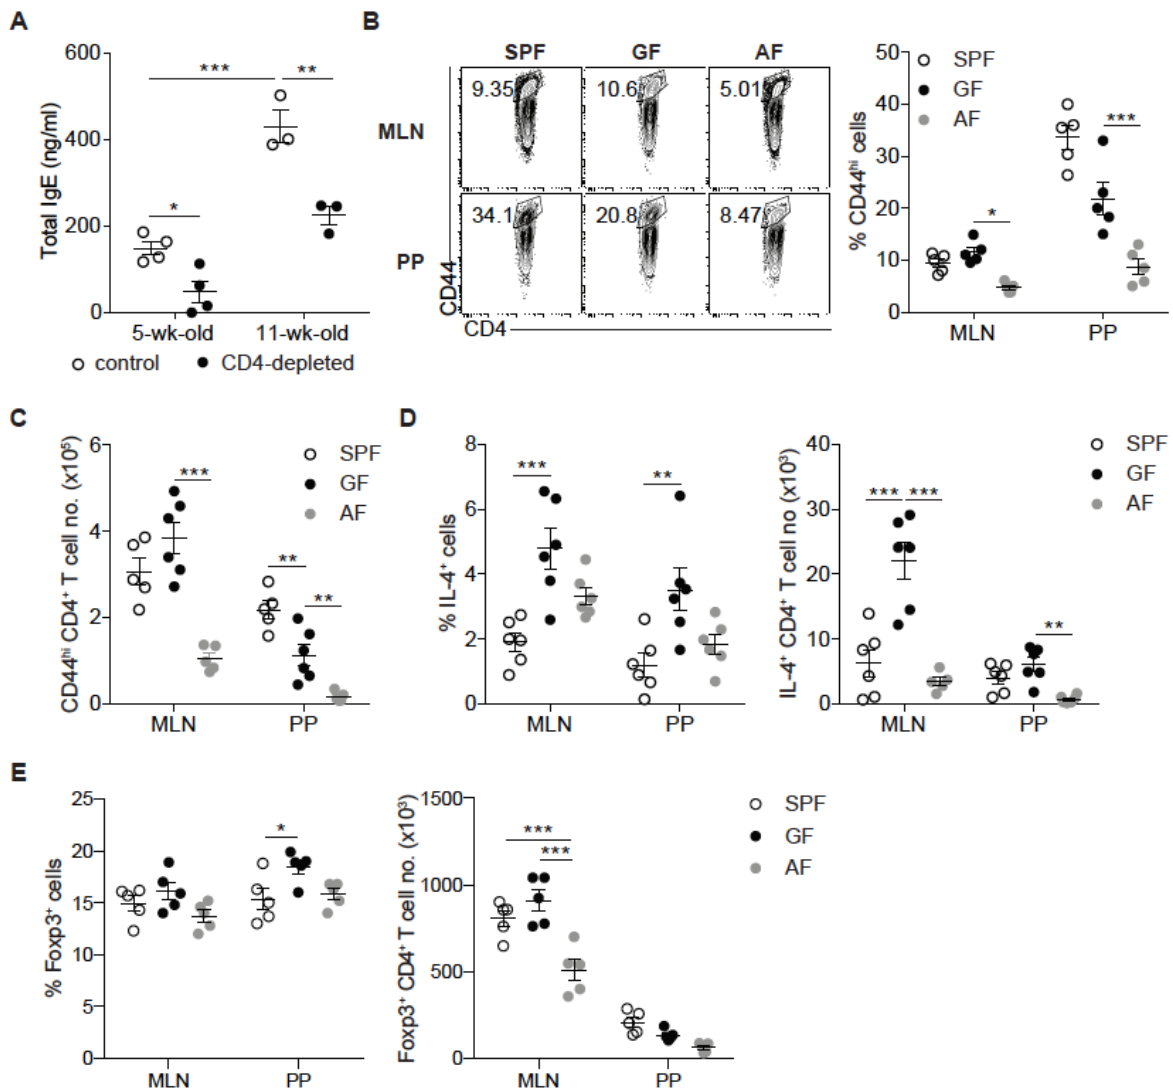

**Fig. S1. MLN and PP of GF mice are major sites for TH2-skewed immune response against food Ags.** (A) Serum IgE levels in 5-wk or 11-wk-old GF mice after treatment with anti-CD4 depleting antibody (120  $\mu$ g/mouse) twice a week for 3 wks (n=4 for 5-wk-old mice, n=3 for 11-wk-old mice). (B) Representative FACS plot of CD44 and CD4 (left) and the frequency of CD44<sup>hi</sup> activated CD4<sup>+</sup> T cells (right) gated on live CD4<sup>+</sup> TCR $\beta$ <sup>+</sup> Foxp3<sup>-</sup> cells in MLN and PP from 10-wk-old GF and AF mice (n=5). (C) The number of CD44<sup>hi</sup> activated CD4<sup>+</sup> T cells at indicated tissues. (D) The frequency of IL-4-producing cells gated on CD4<sup>+</sup>

TCR $\beta^+$  CD44<sup>hi</sup> cells (left) and the number of IL-4-producing CD4<sup>+</sup> T cells (right) in MLN and PP from 10-wk-old SPF, GF and AF mice (n=6). (E) The frequency of Foxp3<sup>+</sup> cells gated on CD4<sup>+</sup> TCR $\beta^+$  cells (left) and the number of Foxp3<sup>+</sup> CD4<sup>+</sup> T cells (right) in MLN and PP from 10-wk-old SPF, GF and AF mice (n=5). Data in (A) are representative of two independent experiments and data in (B-E) are pooled from two or three independent experiments. Each symbol represents an individual mouse. *P*-value was determined by two-way or one-way ANOVA with Tukey's multiple comparisons test. \**P*<0.05, \*\**P*<0.01, \*\*\**P*<0.001. Error bars indicate SEM.

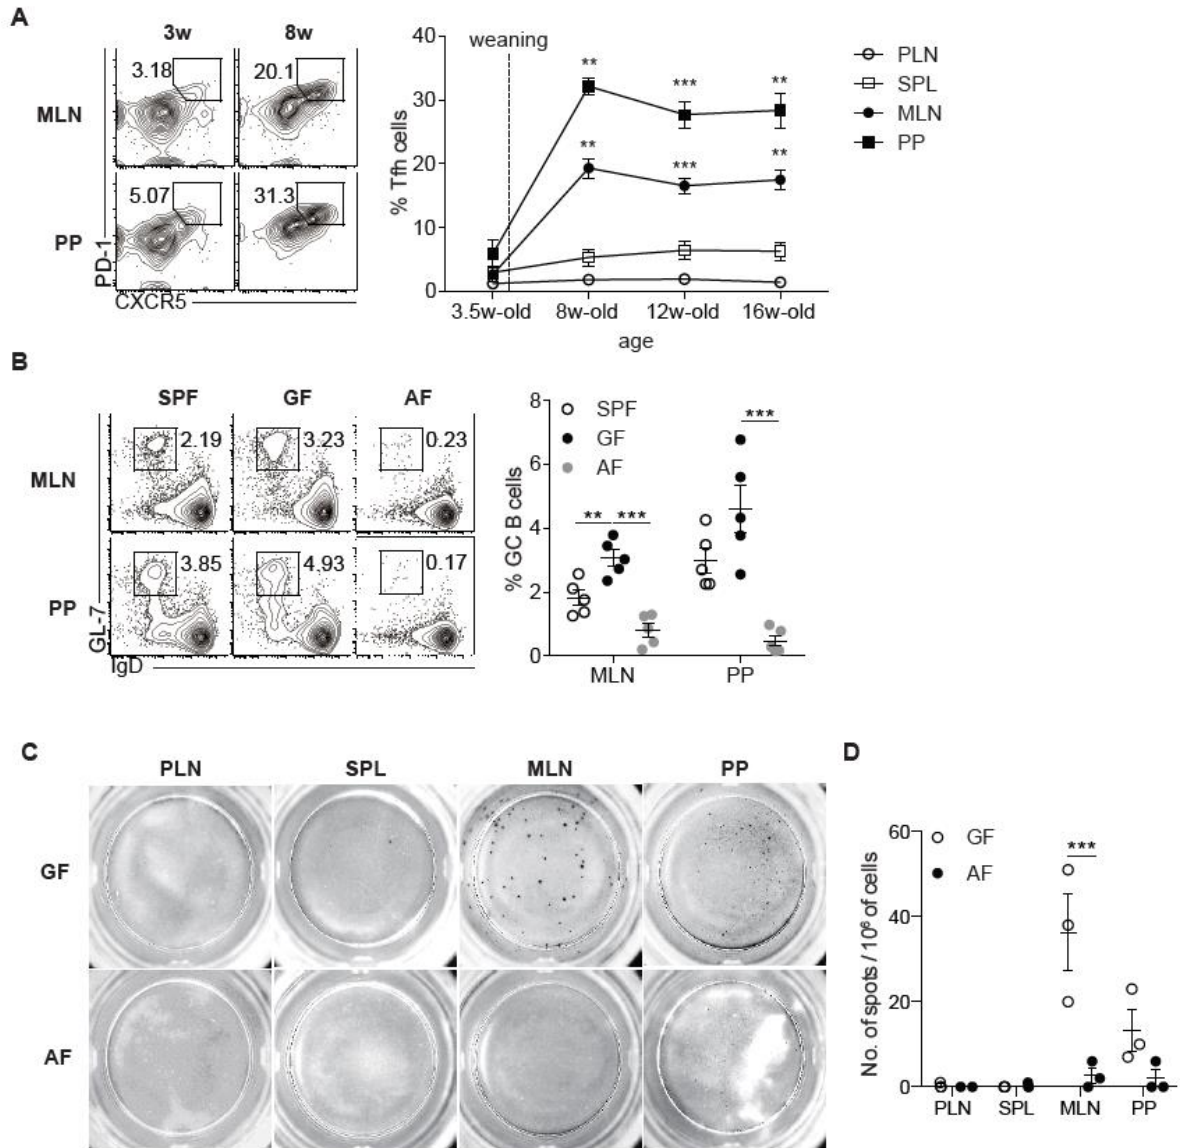

**Fig. S2. T<sub>FH</sub> cells in MLN and PP of GF mice are generated upon weaning onto NCD, and AF mice displayed impaired generation of GC B cells and IgE-producing cells. (A)** The frequency of PD-1<sup>hi</sup> CXCR5<sup>+</sup> T<sub>FH</sub> cells gated on CD4<sup>+</sup> TCRβ<sup>+</sup> Foxp3<sup>-</sup> CD44<sup>hi</sup> cells in PLN, SPL, MLN and PP from GF mice at indicated ages (n=3 per each time point). Dashed line indicates time point for weaning. **(B)** Representative FACS plot of GL-7 and IgD (left) and the frequency of GL-7<sup>hi</sup> IgD<sup>lo</sup> GC B cells (right) gated on B220<sup>+</sup> cells (n=5). **(C)** Representative ELISPOT wells for IgE-producing cells in indicated tissues. **(D)** The number

of IgE-producing cells in indicated tissues (n=3). Data in (B, D) are representative of three independent experiments. Each symbol represents an individual mouse. *P*-value was determined by one-way ANOVA with Tukey's multiple comparisons test. \*\**P*<0.01, \*\*\**P*<0.001. Error bars indicate SEM.

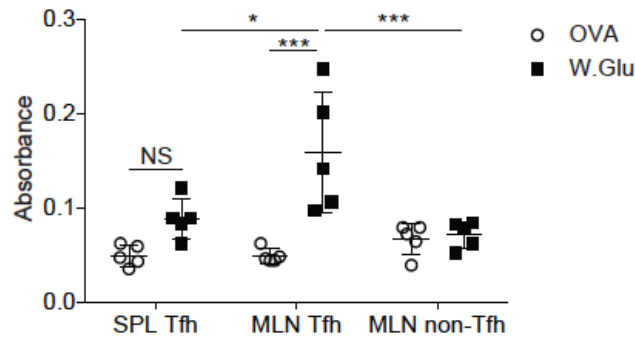

**Fig. S3. Levels of wheat gluten-specific IgE in GF *Rag1*<sup>-/-</sup> mice cotransferred with naïve B cells and indicated CD4<sup>+</sup> T cell subsets.** As described in Figure 2G, FACS-sorted T<sub>FH</sub> cells and non-T<sub>FH</sub> cells in MLN, and T<sub>FH</sub> cells in SPL from 9-12-wk-old GF mice were co-transferred into GF *Rag1*<sup>-/-</sup> mice with naïve B cells isolated from SPF mice. Sera were harvested at 2 wks after transfer, levels of IgE specific to wheat gluten were measured (n=5). Data are pooled from two independent experiments. Each symbol represents an individual mouse. *P*-value was determined by two-way ANOVA with Tukey's multiple comparisons test. \**P*<0.05, \*\*\**P*<0.001. NS, not significant. Error bars indicate SEM.

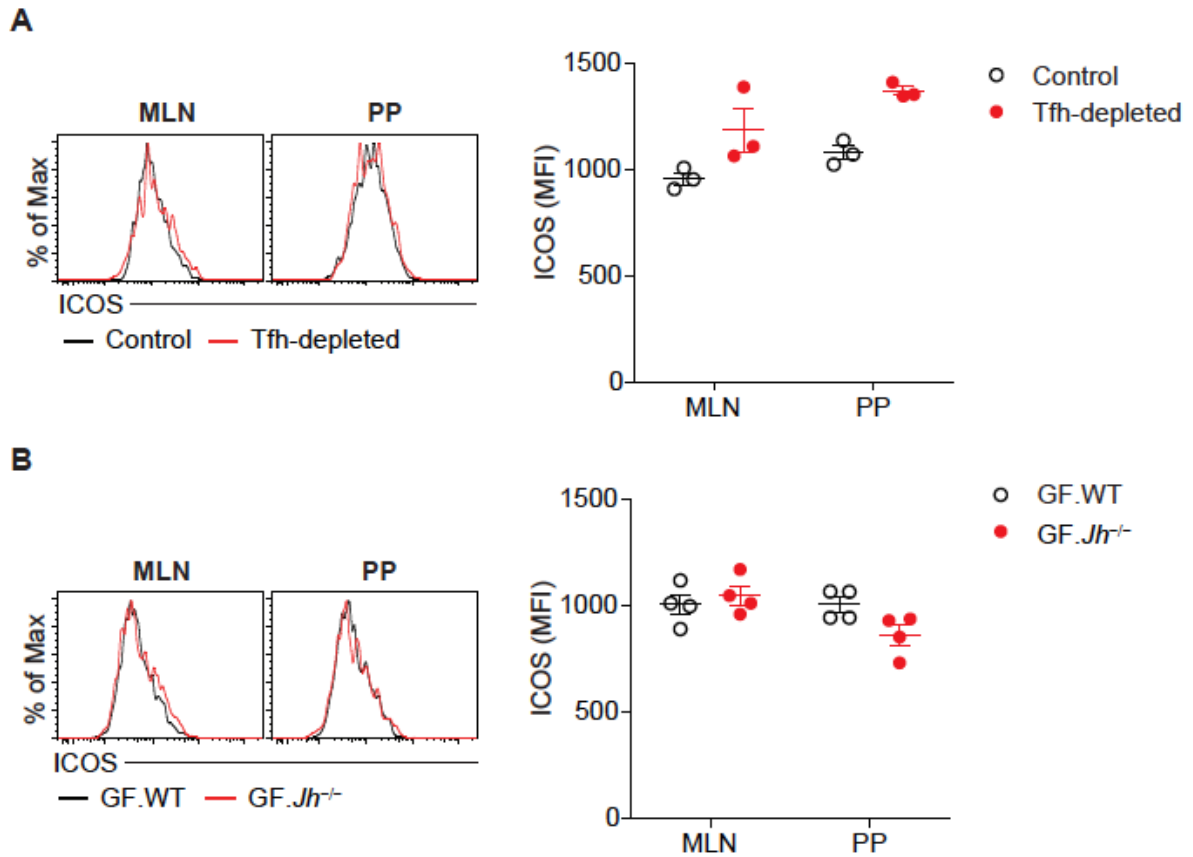

**Fig. S4. ICOS up-regulation on activated CD4<sup>+</sup> T cells is independent on the presence of T<sub>FH</sub> cells and B cells.** (A) Representative histograms (left) and MFI of ICOS expression (right) on CD44<sup>hi</sup> activated CD4<sup>+</sup> T cells (live CD4<sup>+</sup> TCRβ<sup>+</sup> Foxp3<sup>-</sup> CD44<sup>hi</sup>) in MLN and PP from untreated GF mice (control) and GF mice treated with anti-ICOSL antibody (T<sub>FH</sub>-depleted) (n=3). (B) Representative histograms (left) and MFI of ICOS expression (right) on CD44<sup>hi</sup> activated CD4<sup>+</sup> T cells cells in MLN and PP from GF WT and *Jh*<sup>-/-</sup> mice (n=4). Data are representative of two or three independent experiments. Each symbol represents an individual mouse. Error bars indicate SEM.

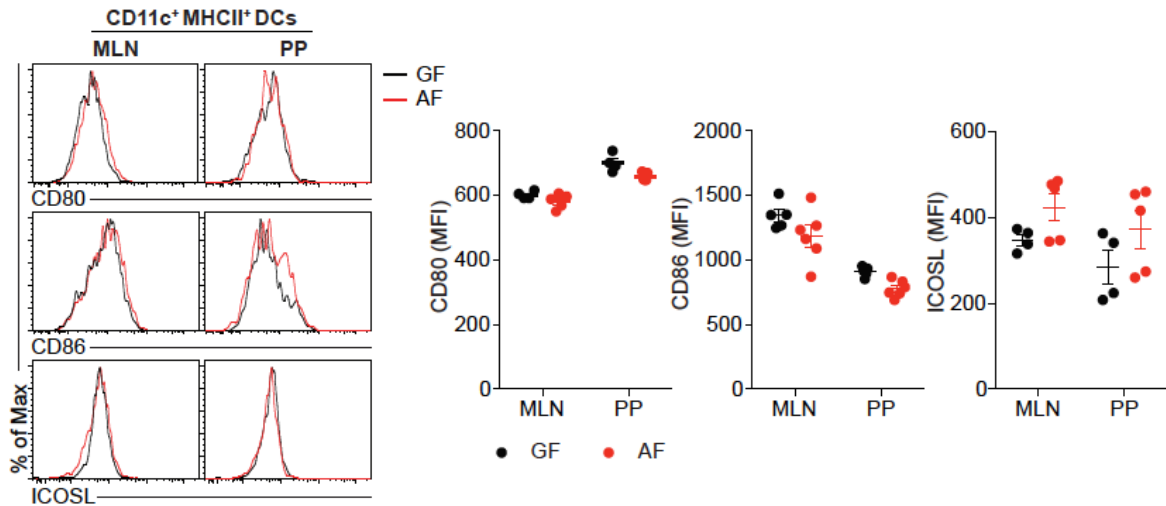

**Fig. S5. Expression levels of CD80, CD86, and ICOSL on MLN and PP DCs are comparable between GF and AF mice.** Representative histograms (left) and MFI (right) of CD80, CD86 and ICOSL on live CD11c<sup>+</sup> MHCII<sup>+</sup> B220<sup>-</sup> DCs in MLN and PP from 9-wk-old GF and AF mice (n=4~6). Data are pooled from two independent experiments. Each symbol represents an individual mouse. Error bars indicate SEM.



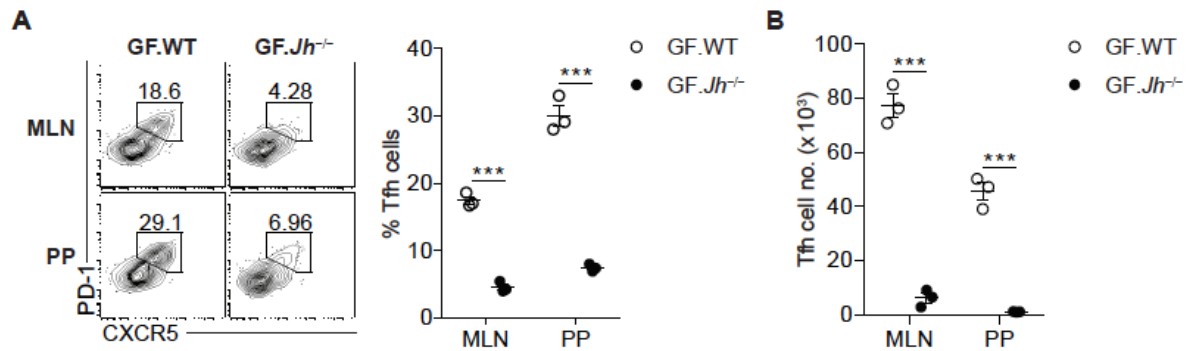

**Fig. S6. B cells are required for the generation of food Ag-driven T<sub>FH</sub> cells in GALT. (A)** Representative FACS plot of CXCR5 and PD-1 (left) and the frequency of PD-1<sup>hi</sup> CXCR5<sup>+</sup> T<sub>FH</sub> cells (right) gated on CD4<sup>+</sup> TCRβ<sup>+</sup> Foxp3<sup>-</sup> CD44<sup>hi</sup> cells in MLN and PP of 9~10-wk-old GF WT and *Jh*<sup>-/-</sup> mice (n=3). **(B)** The number of T<sub>FH</sub> cells in indicated tissues from GF WT and *Jh*<sup>-/-</sup> mice. Data are representative of three independent experiments. Each symbol represents an individual mouse. Statistical differences were determined by two-way ANOVA with Tukey's multiple comparisons test. \*\*\**P*<0.001. Error bars indicate SEM.

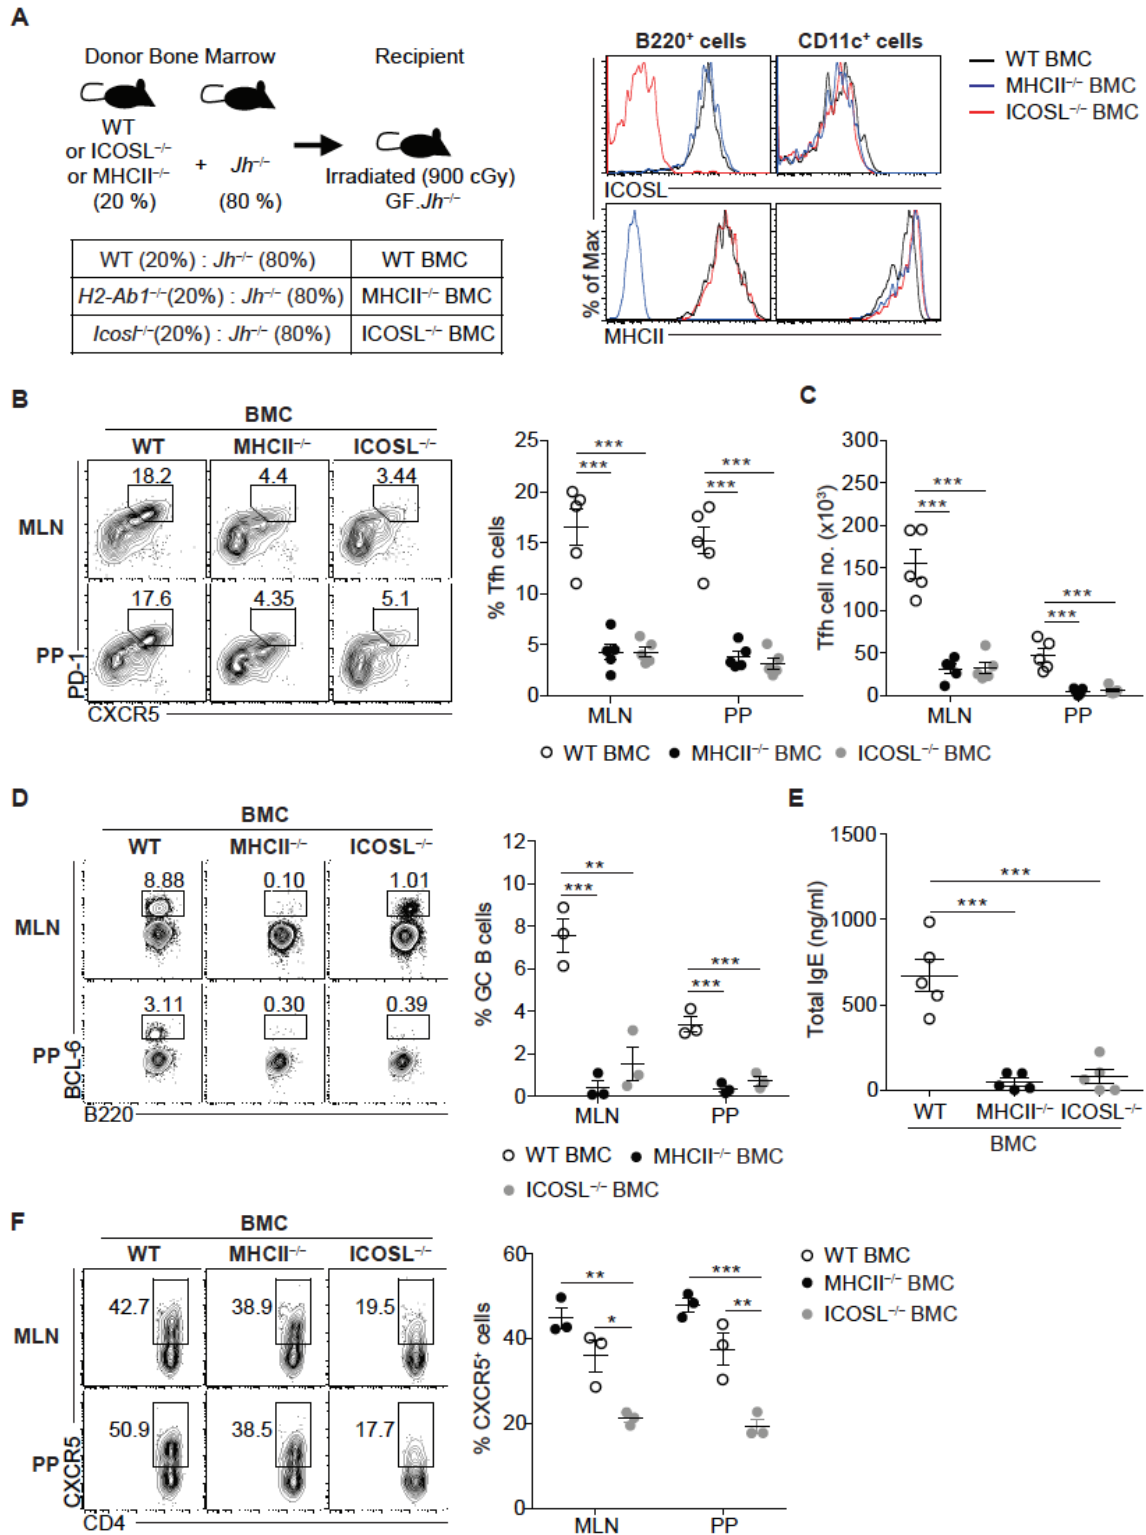

**Fig. S7. B cells promote terminal differentiation of food Ag-driven T<sub>FH</sub> cells by providing ICOS signaling and presenting cognate Ags.** Mixed bone marrow chimeras (BMCs) were generated by reconstituting lethally irradiated (900 cGy) GF *Jh*<sup>-/-</sup> mice with

8:2 mixture of *Jh*<sup>-/-</sup> BM cells and either *Icosl*<sup>-/-</sup> (ICOSL<sup>-/-</sup> BMC) or *H2-Ab1*<sup>-/-</sup> (MHCII<sup>-/-</sup> BMC) BM cells. As a control, BMCs with a mixture of *Jh*<sup>-/-</sup> and WT BM cells were used. BMCs were analyzed at 6 wks after BM reconstitution. **(A)** Schematic view of mixed BMC generation (left) and representative histograms showing ICOSL (top) and MHCII (bottom) expression levels on B220<sup>+</sup> cells and CD11c<sup>+</sup> cells in indicated mixed BMC. **(B)** Representative FACS plots of CXCR5 and PD-1 (left) and the frequency of PD-1<sup>hi</sup> CXCR5<sup>+</sup> T<sub>FH</sub> cells (right) gated on live CD4<sup>+</sup> TCRβ<sup>+</sup> Foxp3<sup>-</sup> CD44<sup>hi</sup> cells in MLN and PP of indicated BMCs. **(C)** Number of PD-1<sup>hi</sup> CXCR5<sup>+</sup> T<sub>FH</sub> cells in MLN and PP of indicated BMCs. **(D)** Representative FACS plot of BCL-6 and B220 (left) and the frequency of B220<sup>+</sup> BCL-6<sup>+</sup> GC B cells (right) gated on live B220<sup>+</sup> cells (n=3). **(E)** Serum IgE levels of indicated BMCs (n=5). **(F)** Representative FACS plot of CXCR5 and CD4 (left) and the frequency of CXCR5-expressing cells (right) gated on live CD4<sup>+</sup> TCRβ<sup>+</sup> Foxp3<sup>-</sup> CD44<sup>hi</sup> cells (n=3). Data in (A, D, F) are representative of two independent experiments. Data from two independent experiments are pooled (B, C, E). Each symbol represents an individual mouse. *P*-value was determined by one-way ANOVA with Tukey's multiple comparisons test. \**P*<0.05, \*\**P*<0.01, \*\*\**P*<0.001. Error bars indicate SEM.

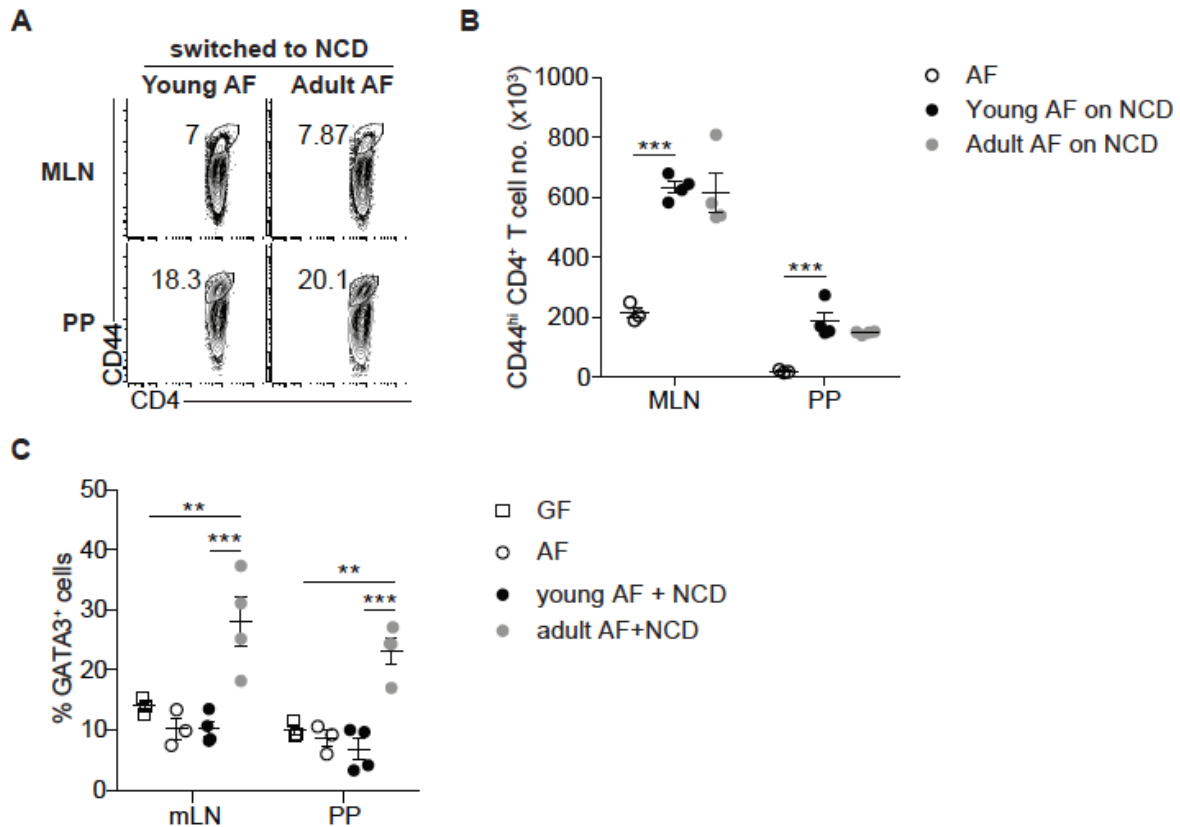

**Fig. S8. Levels of CD4<sup>+</sup> T cell activation in MLN and PP are comparable between young and adult AF mice switched to NCD, but the latter shows increased levels of TH2 cells.** Young and adult AF mice (4 wks old and 8 wks old, respectively) were switched to NCD for 4 wks. (A and B) Representative FACS plot of CD44 and CD4 (A) and the number of CD44<sup>hi</sup> CD4<sup>+</sup> T cells (B) gated on live CD4<sup>+</sup> TCR $\beta$ <sup>+</sup> Foxp3<sup>-</sup> cells in MLN and PP (n=3~4). (C) The frequency of GATA3<sup>+</sup> cells gated on live CD44<sup>hi</sup> CD4<sup>+</sup> TCR $\beta$ <sup>+</sup> Foxp3<sup>-</sup> cells in MLN and PP in indicated mice (n=3~4). Data are representative of two independent experiments. Each symbol represents an individual mouse. *P*-value was determined by one-way ANOVA with Tukey's multiple comparisons test. \*\**P*<0.01, \*\*\**P*<0.001. Error bars indicate SEM.

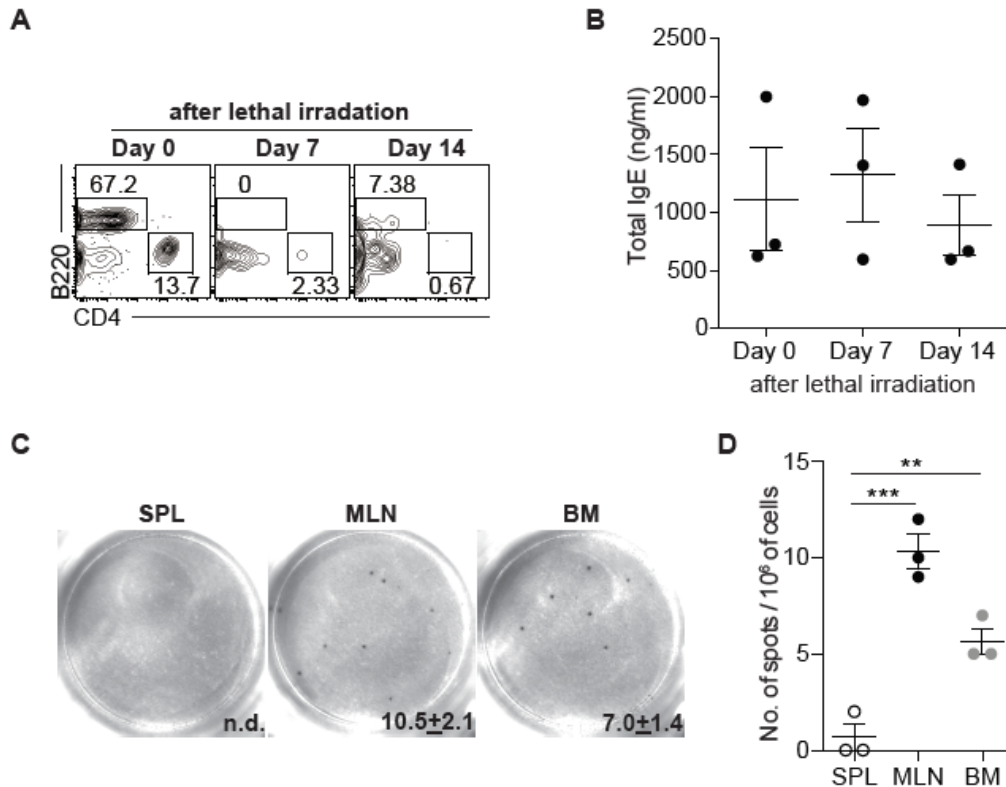

**Fig. S9. High serum IgE levels in adult GF mice are sustained by radioresistant long-lived IgE-producing cells in MLN and BM.** 14-wk-old GF mice were lethally irradiated (900 cGy) and reconstituted with *Rag1*<sup>-/-</sup> BM cells. **(A)** Representative FACS plot showing the depletion of CD4<sup>+</sup> T cells and B cells in blood (n=3). **(B)** Serum IgE levels at day 0, 7 and 14 after irradiation were measured by ELISA. **(C)** IgE-producing cells at indicated tissues were examined by ELISPOT at 2 wks after irradiation. **(D)** The number of IgE-producing cells at indicated tissues (n=3). *P*-value was determined by one-way ANOVA with Tukey's multiple comparisons test. \*\**P*<0.05, \*\*\**P*<0.001. Error bars indicate SEM.

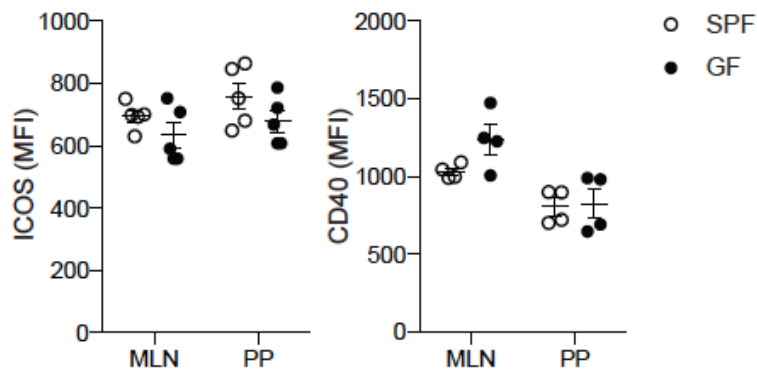

**Fig. S10. ICOS expression on activated CD4<sup>+</sup> T cells and CD40 expression on DCs in MLN and PP in SPF mice are both comparable with those in GF mice.** Single cell suspension was prepared from MLN and PP of 9~10-wk-old GF and SPF mice to examine ICOS and CD40 expression on activated CD4<sup>+</sup> T cells and DCs, respectively (n=4~5). MFI of ICOS expression on CD44<sup>hi</sup> CD4 T cells (left) and MFI of CD40 expression on CD11c<sup>+</sup> MHCII<sup>+</sup> DCs (right) were shown. Data are representative of two independent experiments (n=4~5). Each symbol represents an individual mouse. Error bars indicate SEM.
